# Supplementary material
Source: ML conference proceedings conference paper supplement (https://proceedings.mlr.press/v151/fisher22a.html)

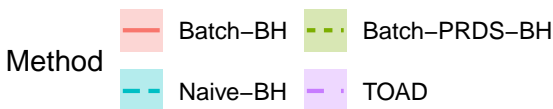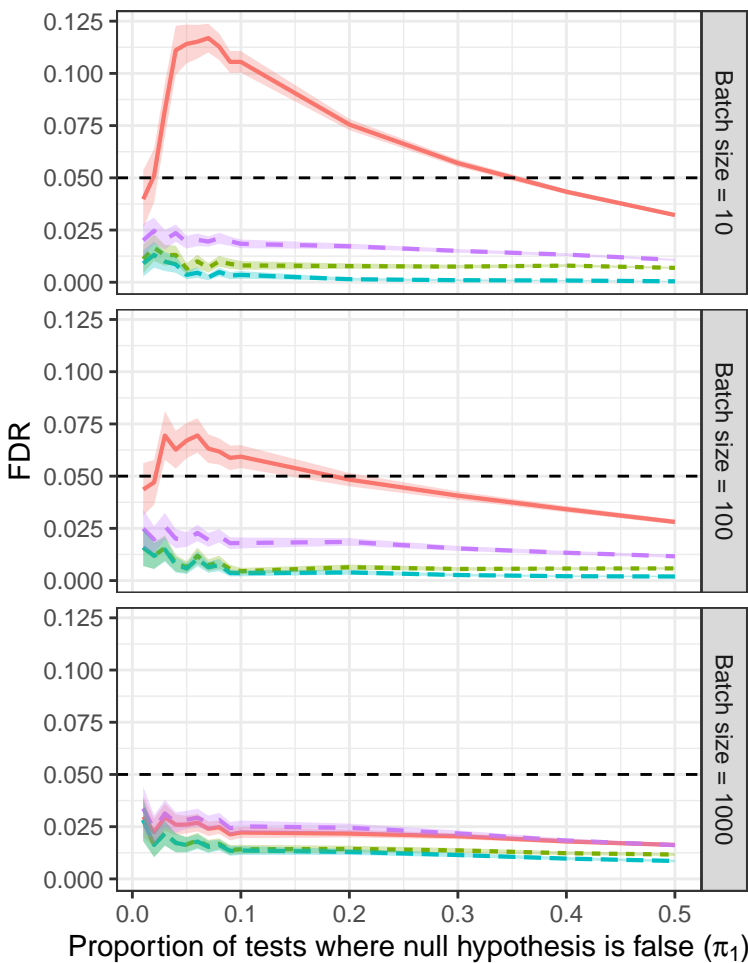

Supplement: Supplementary file 3 [file fisher22a-supp.zip]

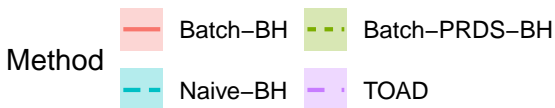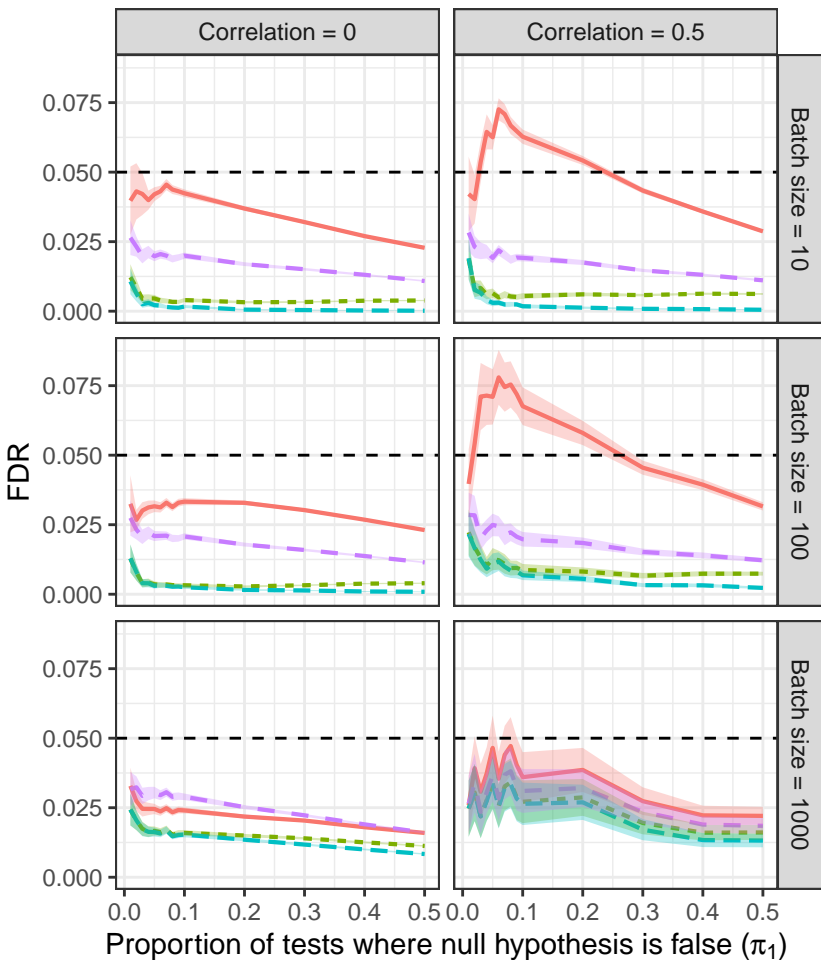

Supplement: Supplementary file 4 [file fisher22a-supp.zip]

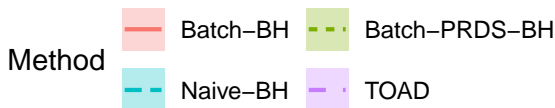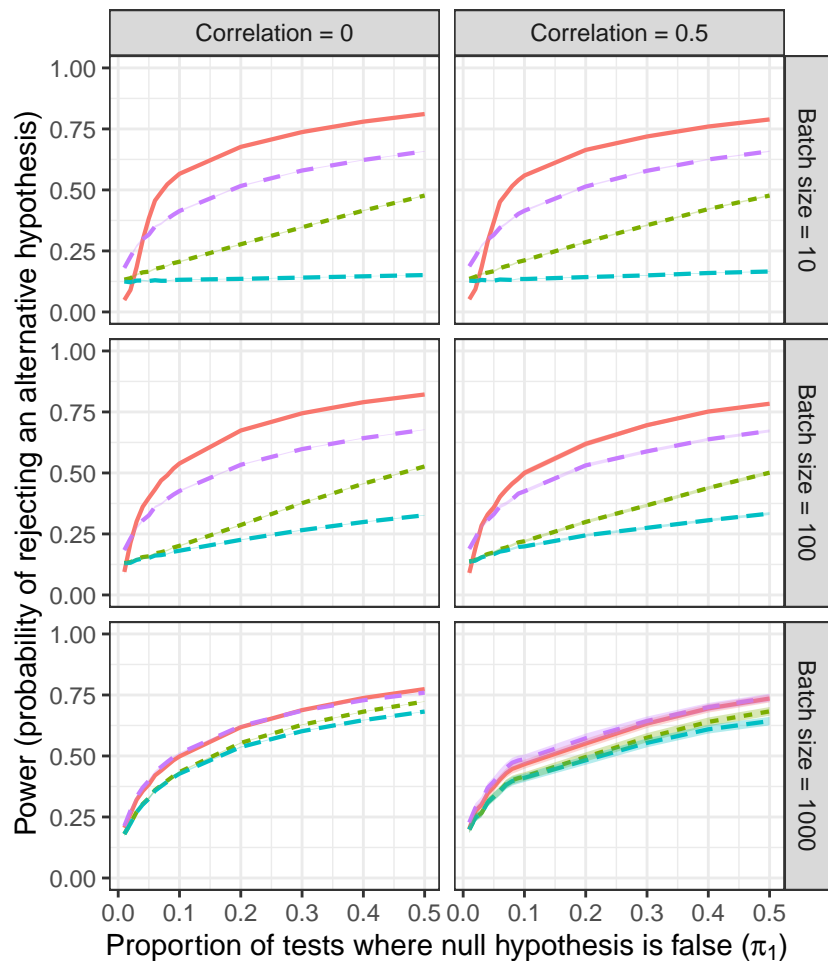

Supplement: Supplementary file 5 [file fisher22a-supp.zip]

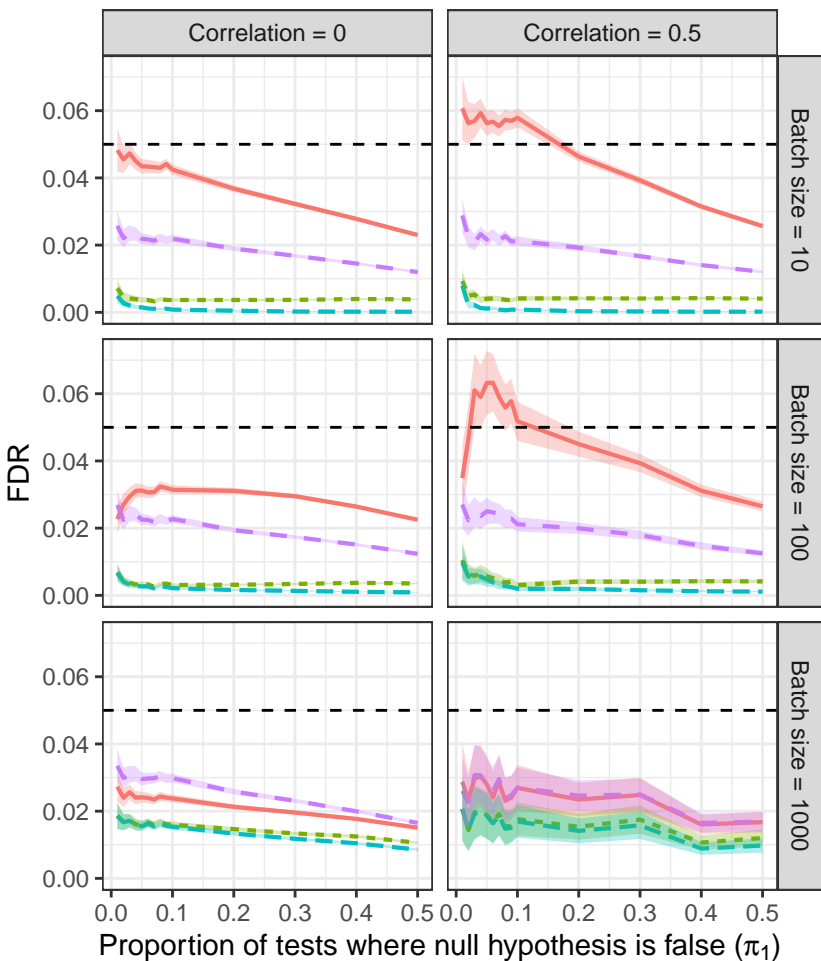

Supplement: Supplementary file 6 [file fisher22a-supp.zip]

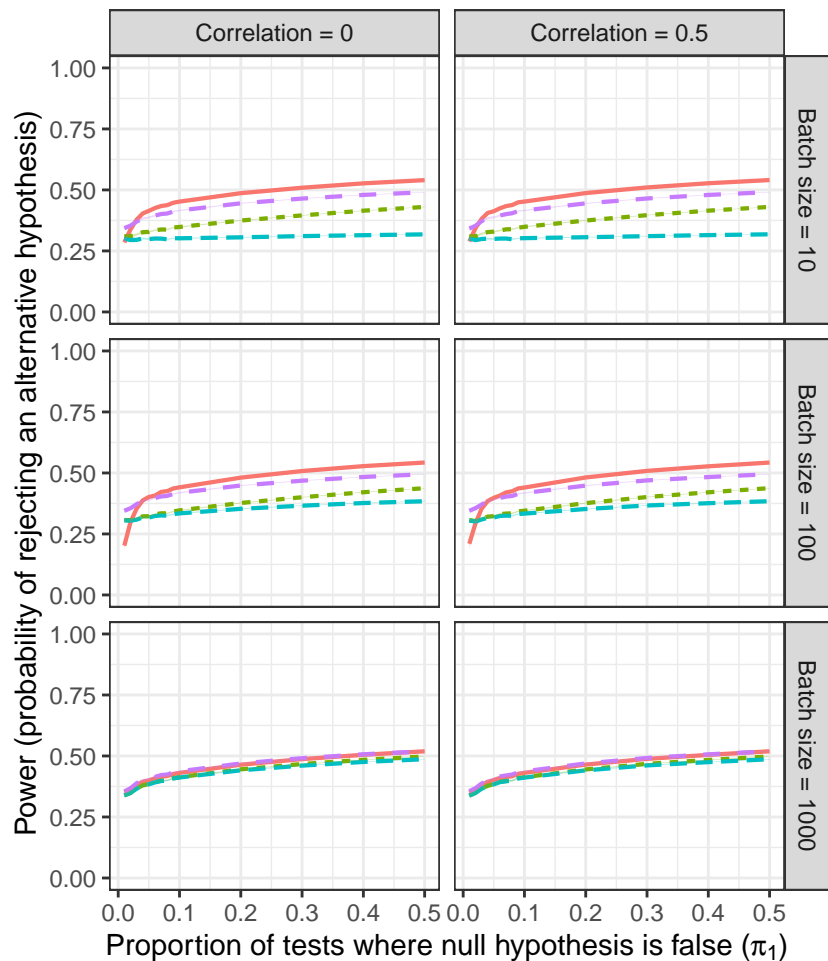

Supplement: Supplementary file 7 [file fisher22a-supp.zip]

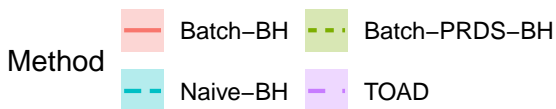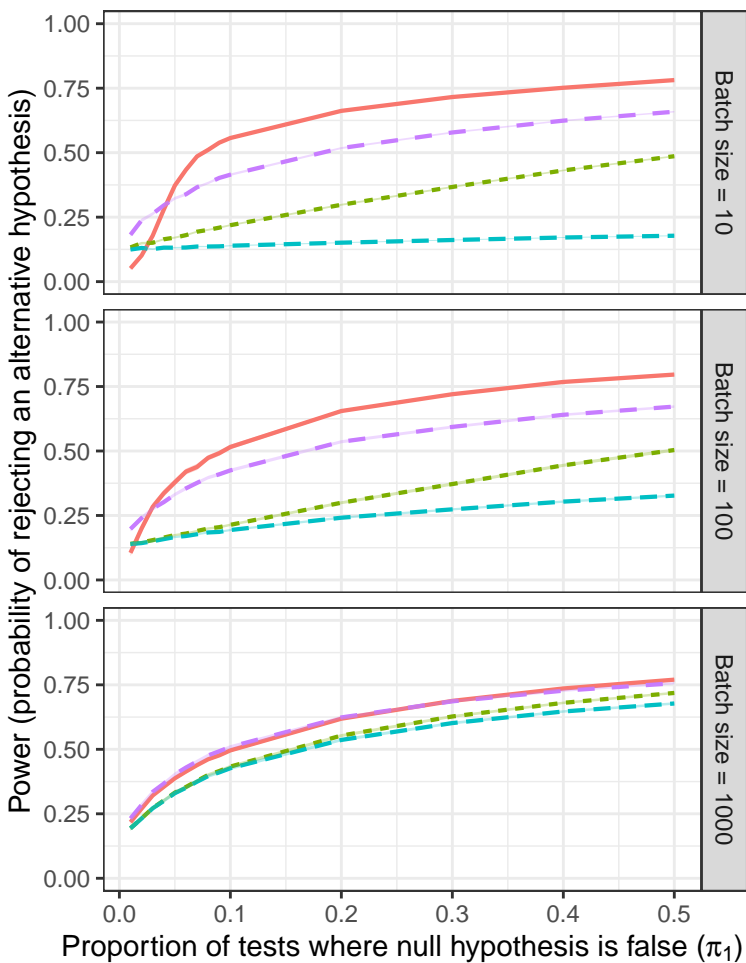

Supplement: Supplementary file 12 [file fisher22a-supp.zip]
